# Supplementary figures and images for: A “turn-off” photoluminescent sensor for H2O2 detection based on a zinc oxide–graphene quantum dot (ZnO–GQD) nanocomposite and the role of amine in the development of GQD
Source: Royal Society of Chemistry journal article supplement (doi:10.1039/d3ra02355a), 2023-01-01

**(e) D2-w**

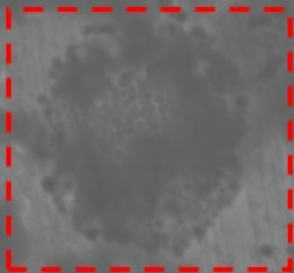

JEOL

SEI

3.0kV

X20,000

WD 8.0mm

1 $\mu$ m

Supplement: d3ra02355a10.pdf [file d3ra02355a10.pdf]

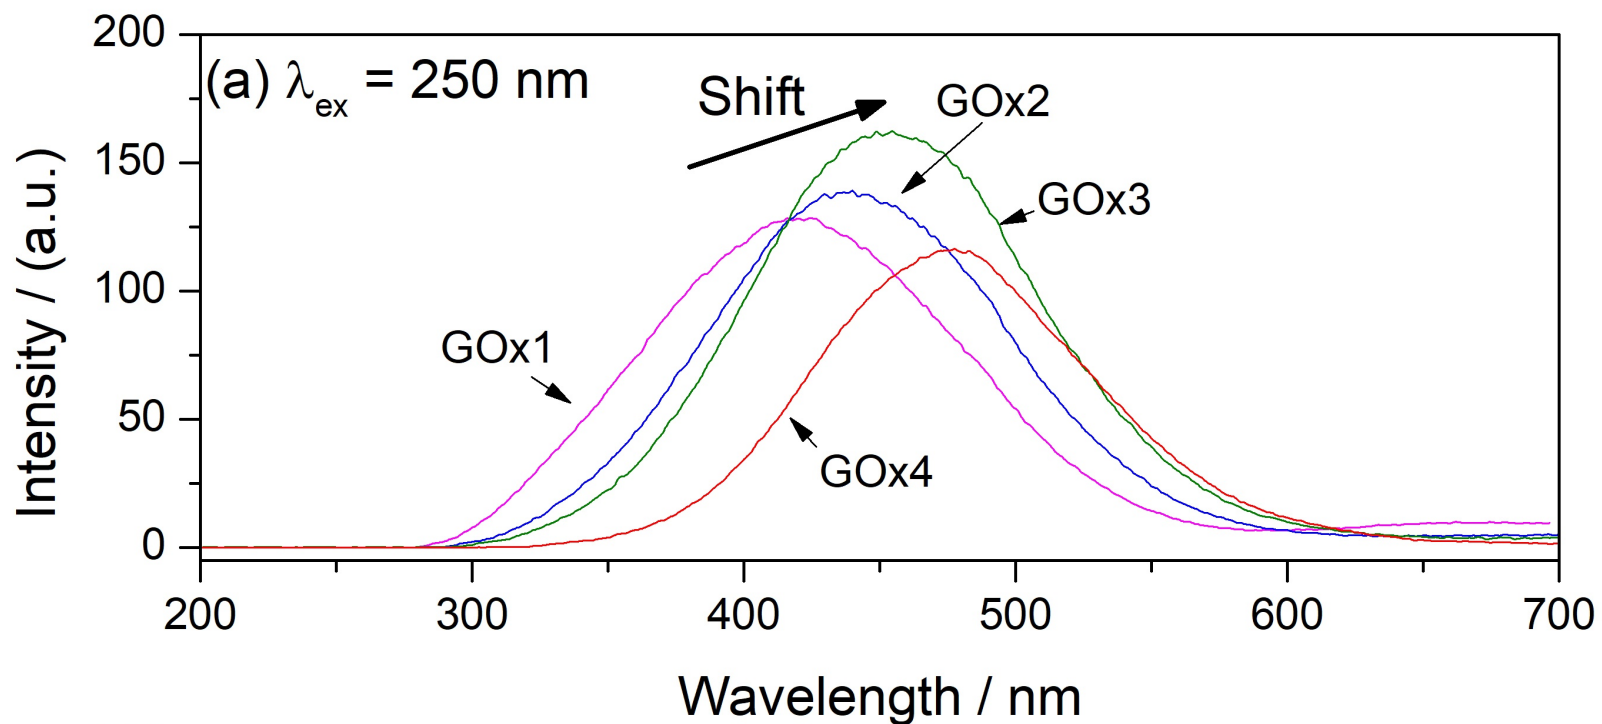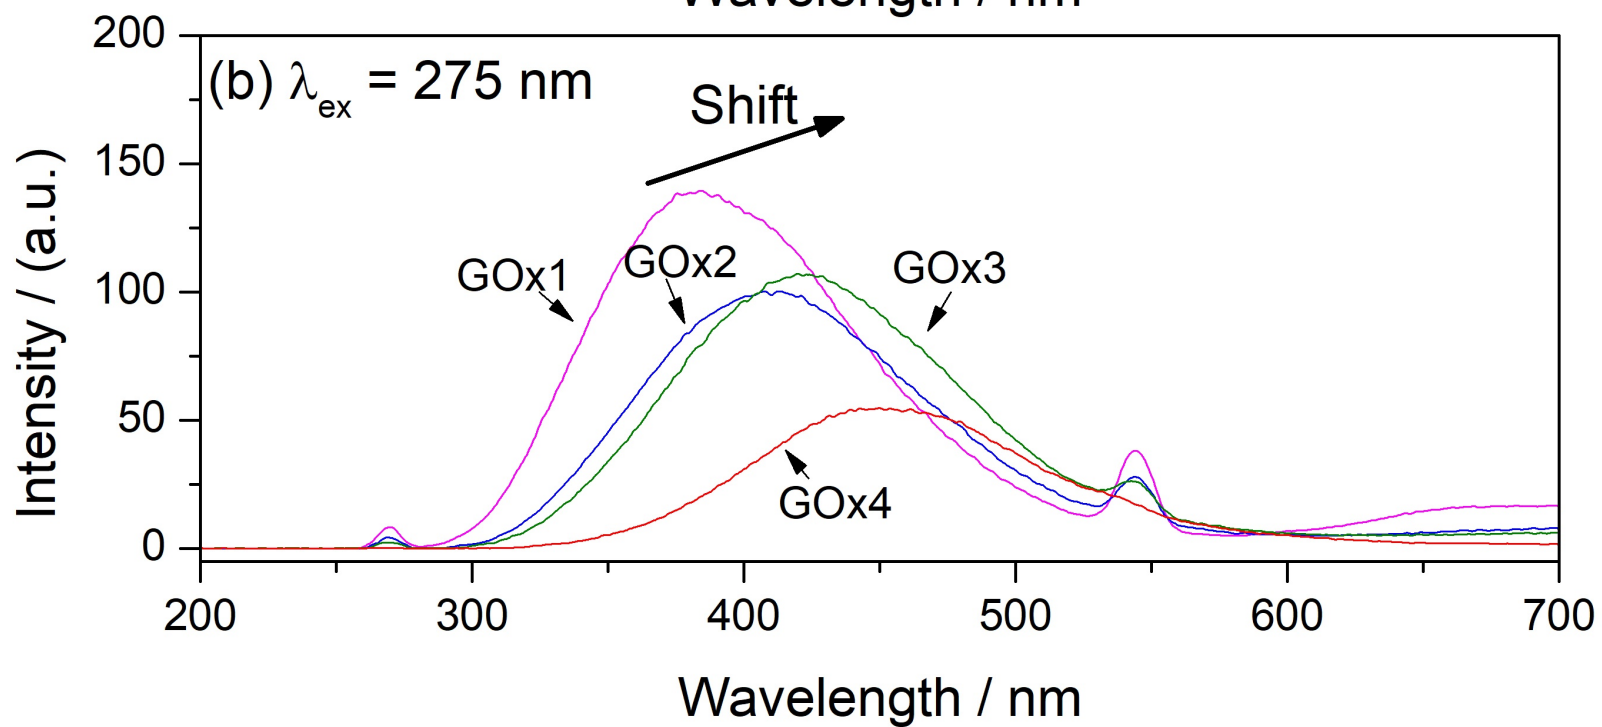

Supplement: d3ra02355a11.pdf [file d3ra02355a11.pdf]

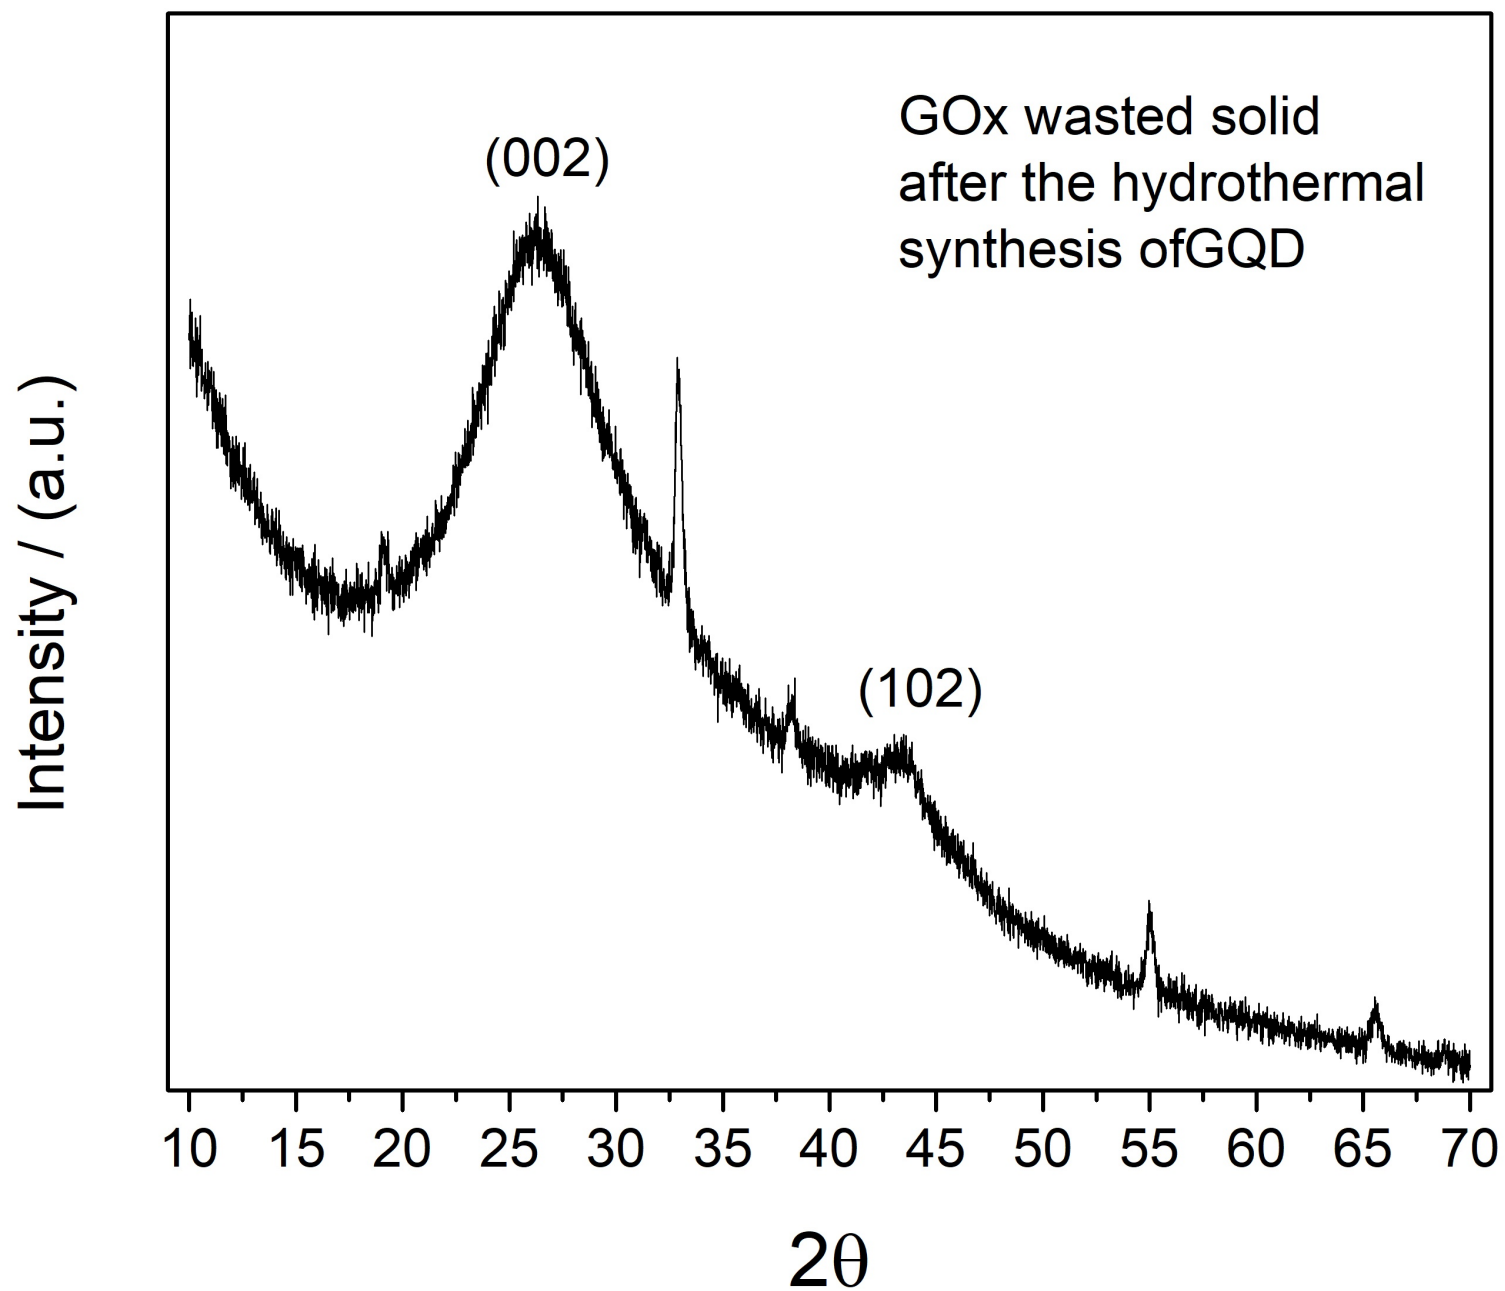

Supplement: d3ra02355a12.pdf [file d3ra02355a12.pdf]

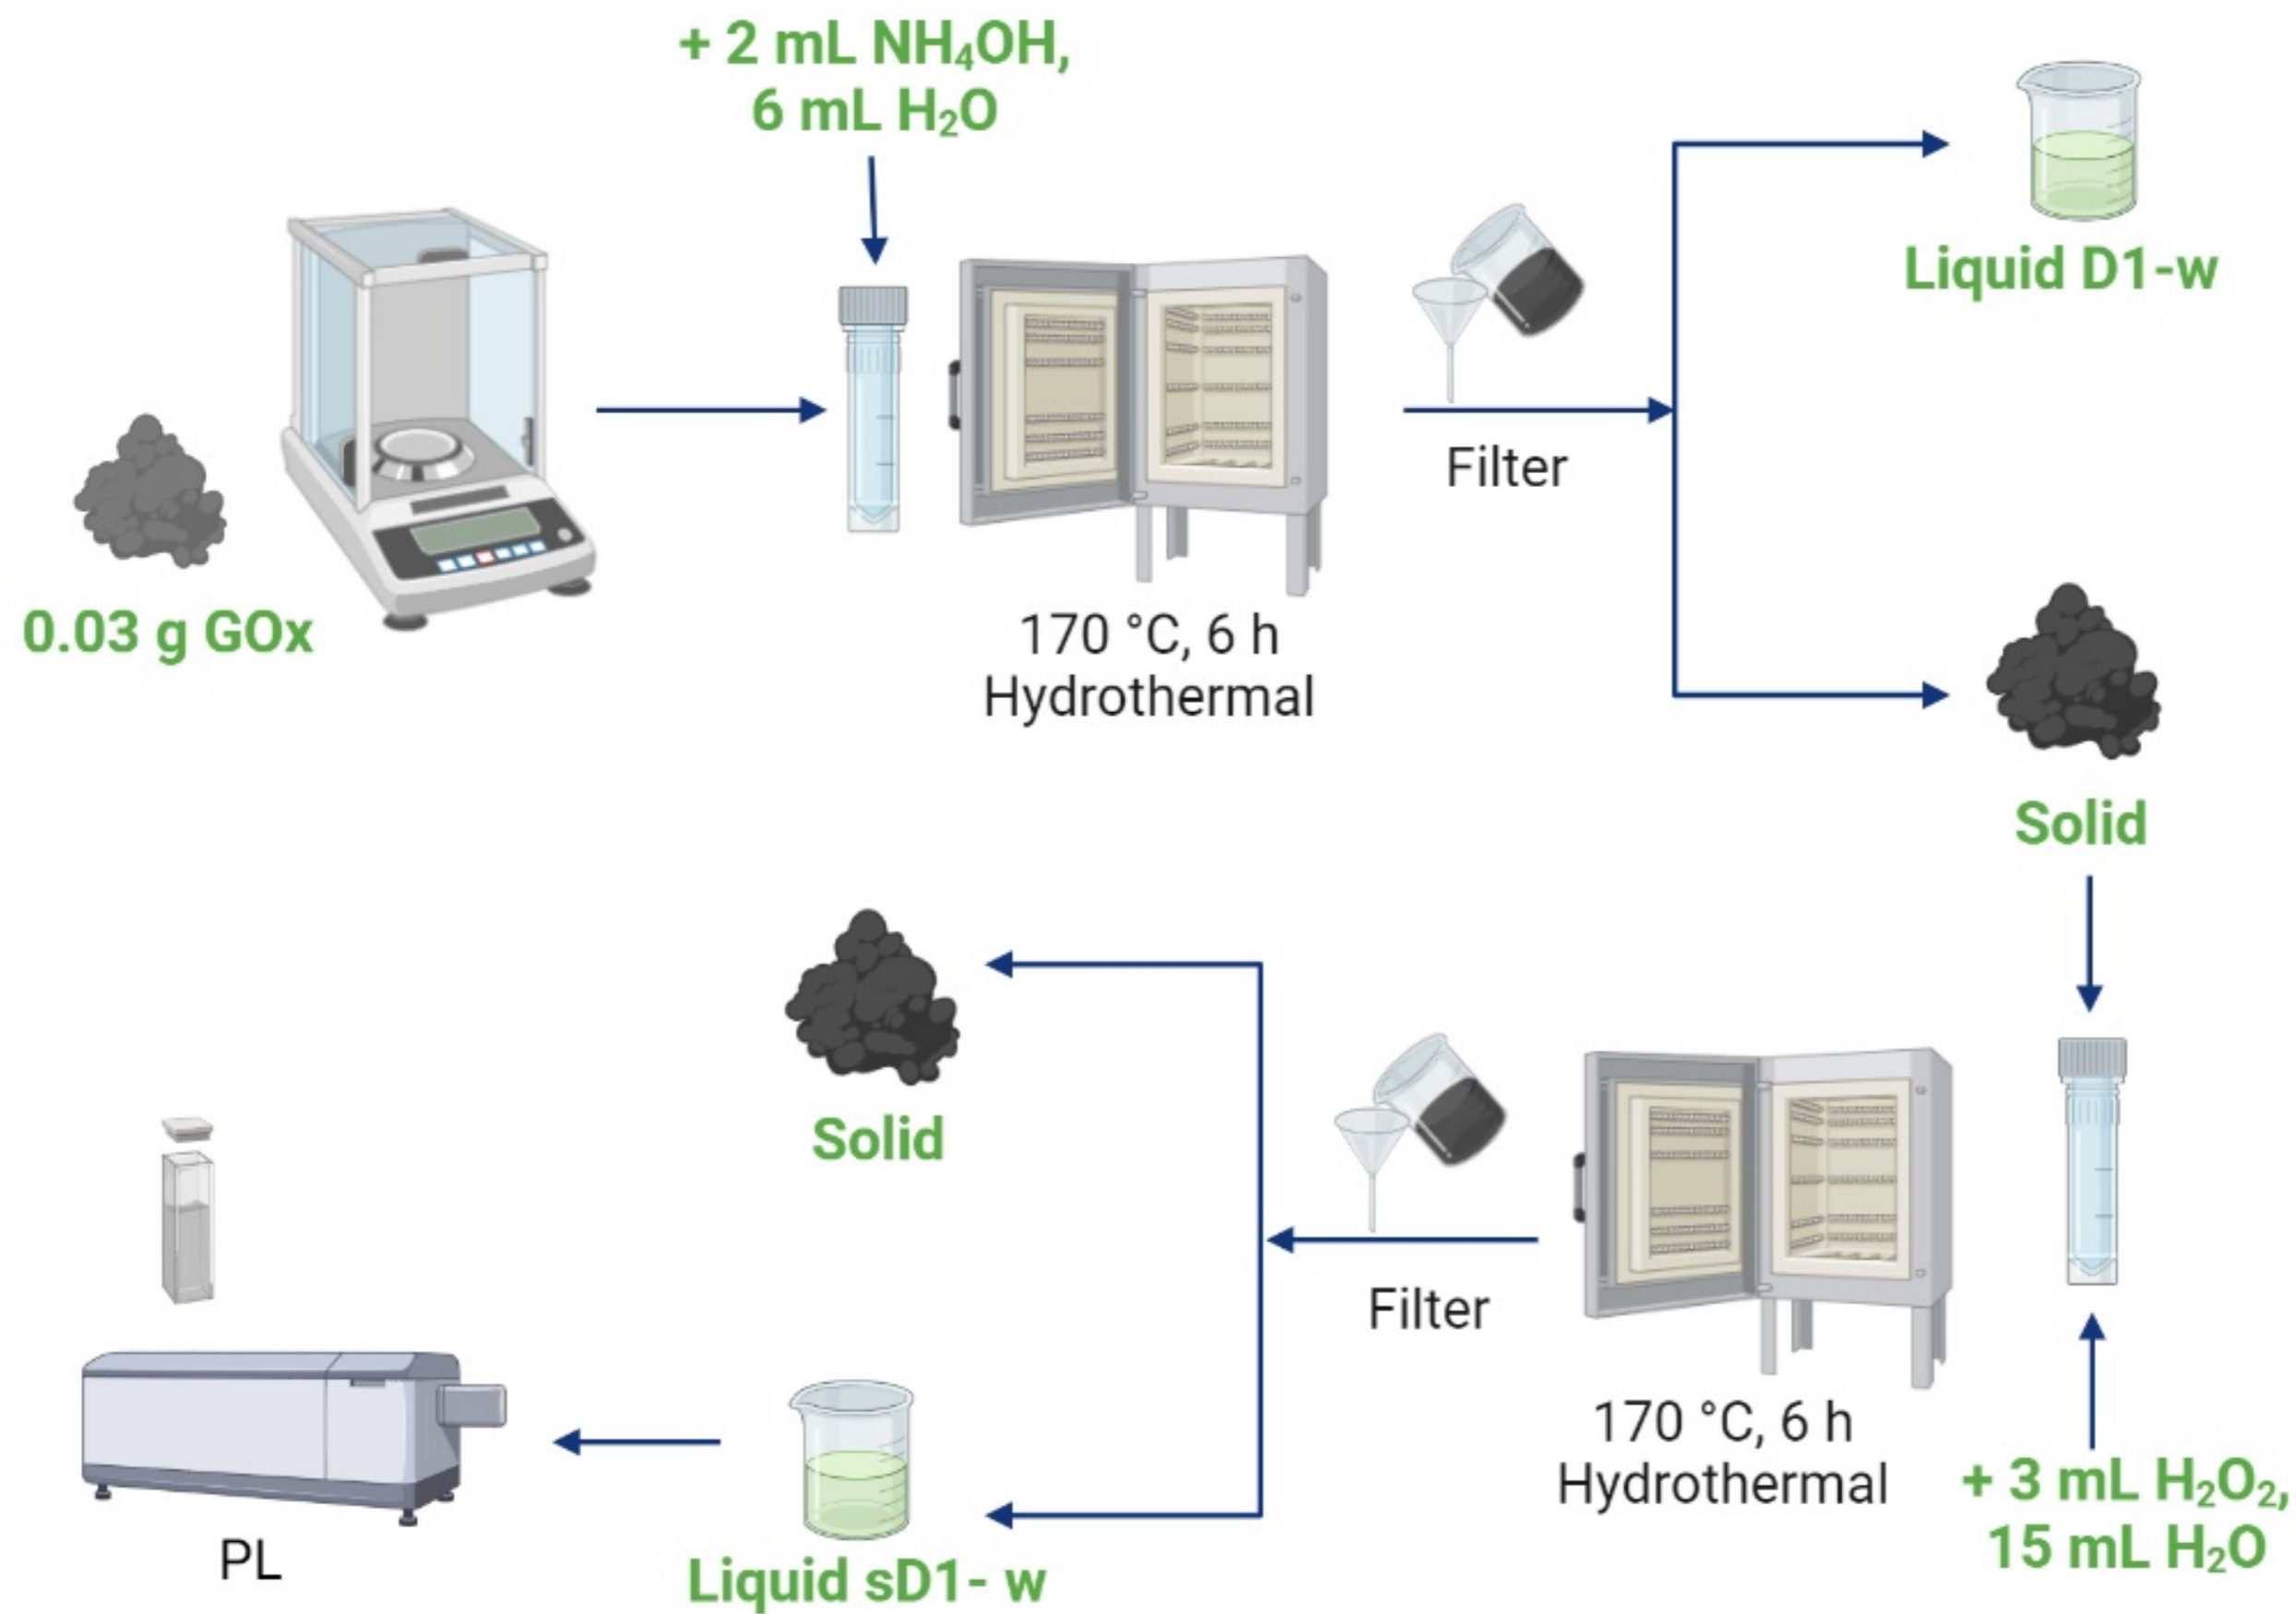

Supplement: d3ra02355a13.pdf [file d3ra02355a13.pdf]

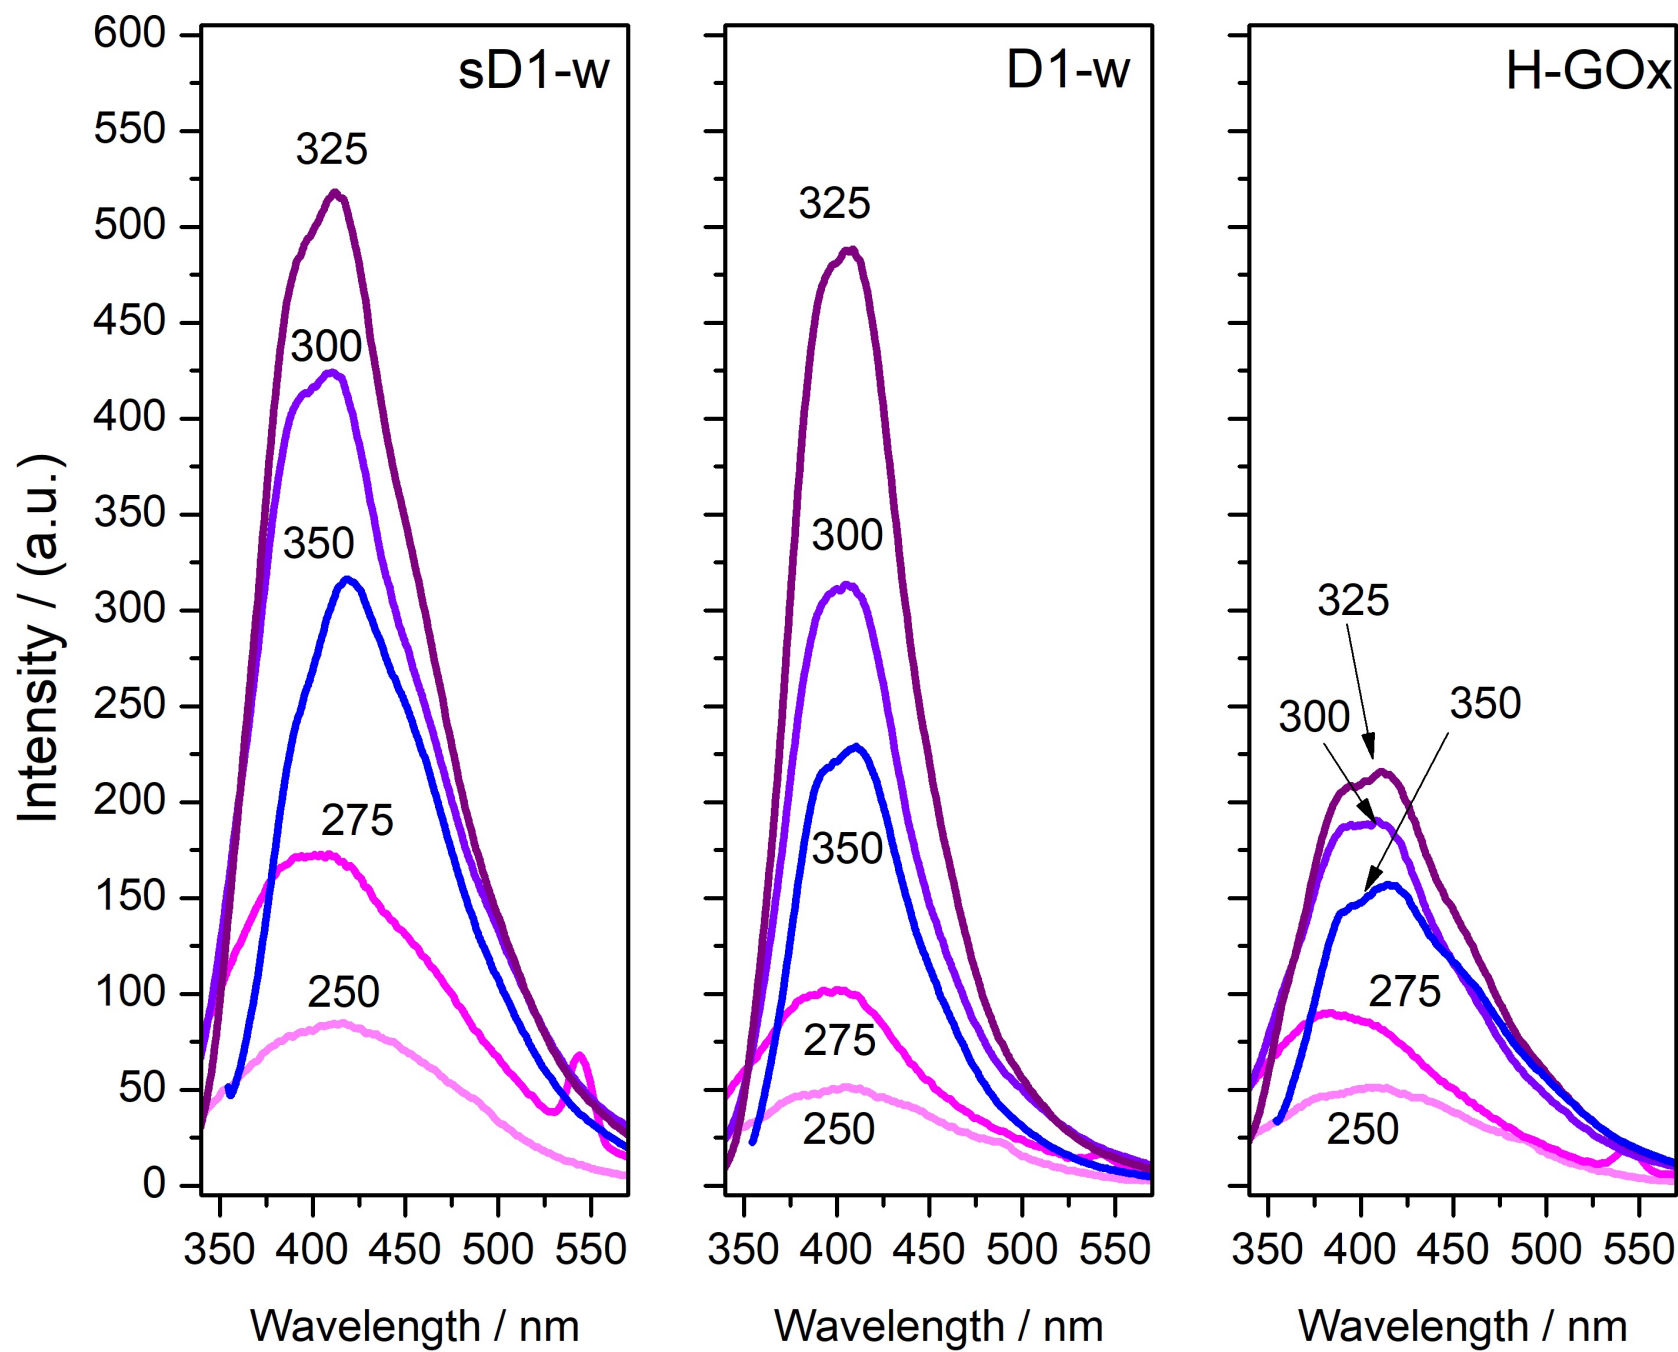

Supplement: d3ra02355a14.pdf [file d3ra02355a14.pdf]

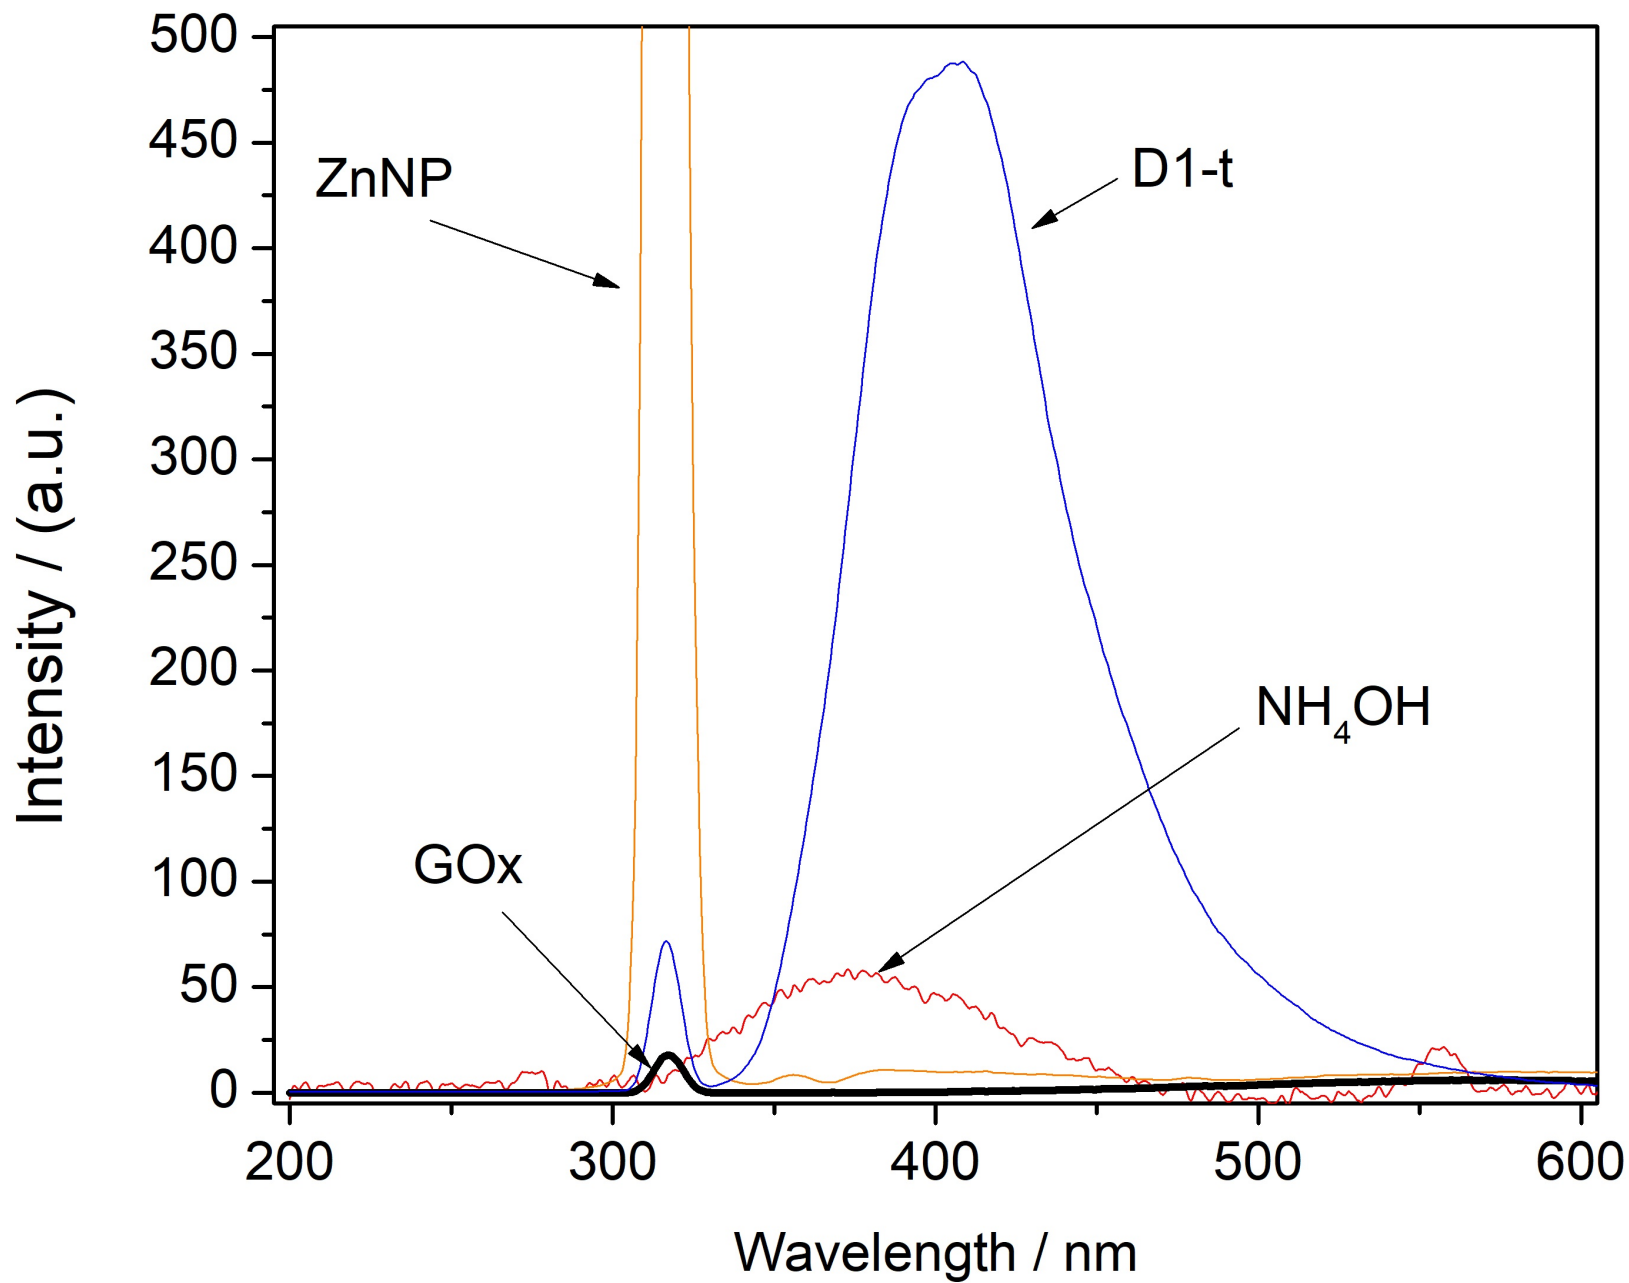

Supplement: d3ra02355a4.pdf [file d3ra02355a4.pdf]

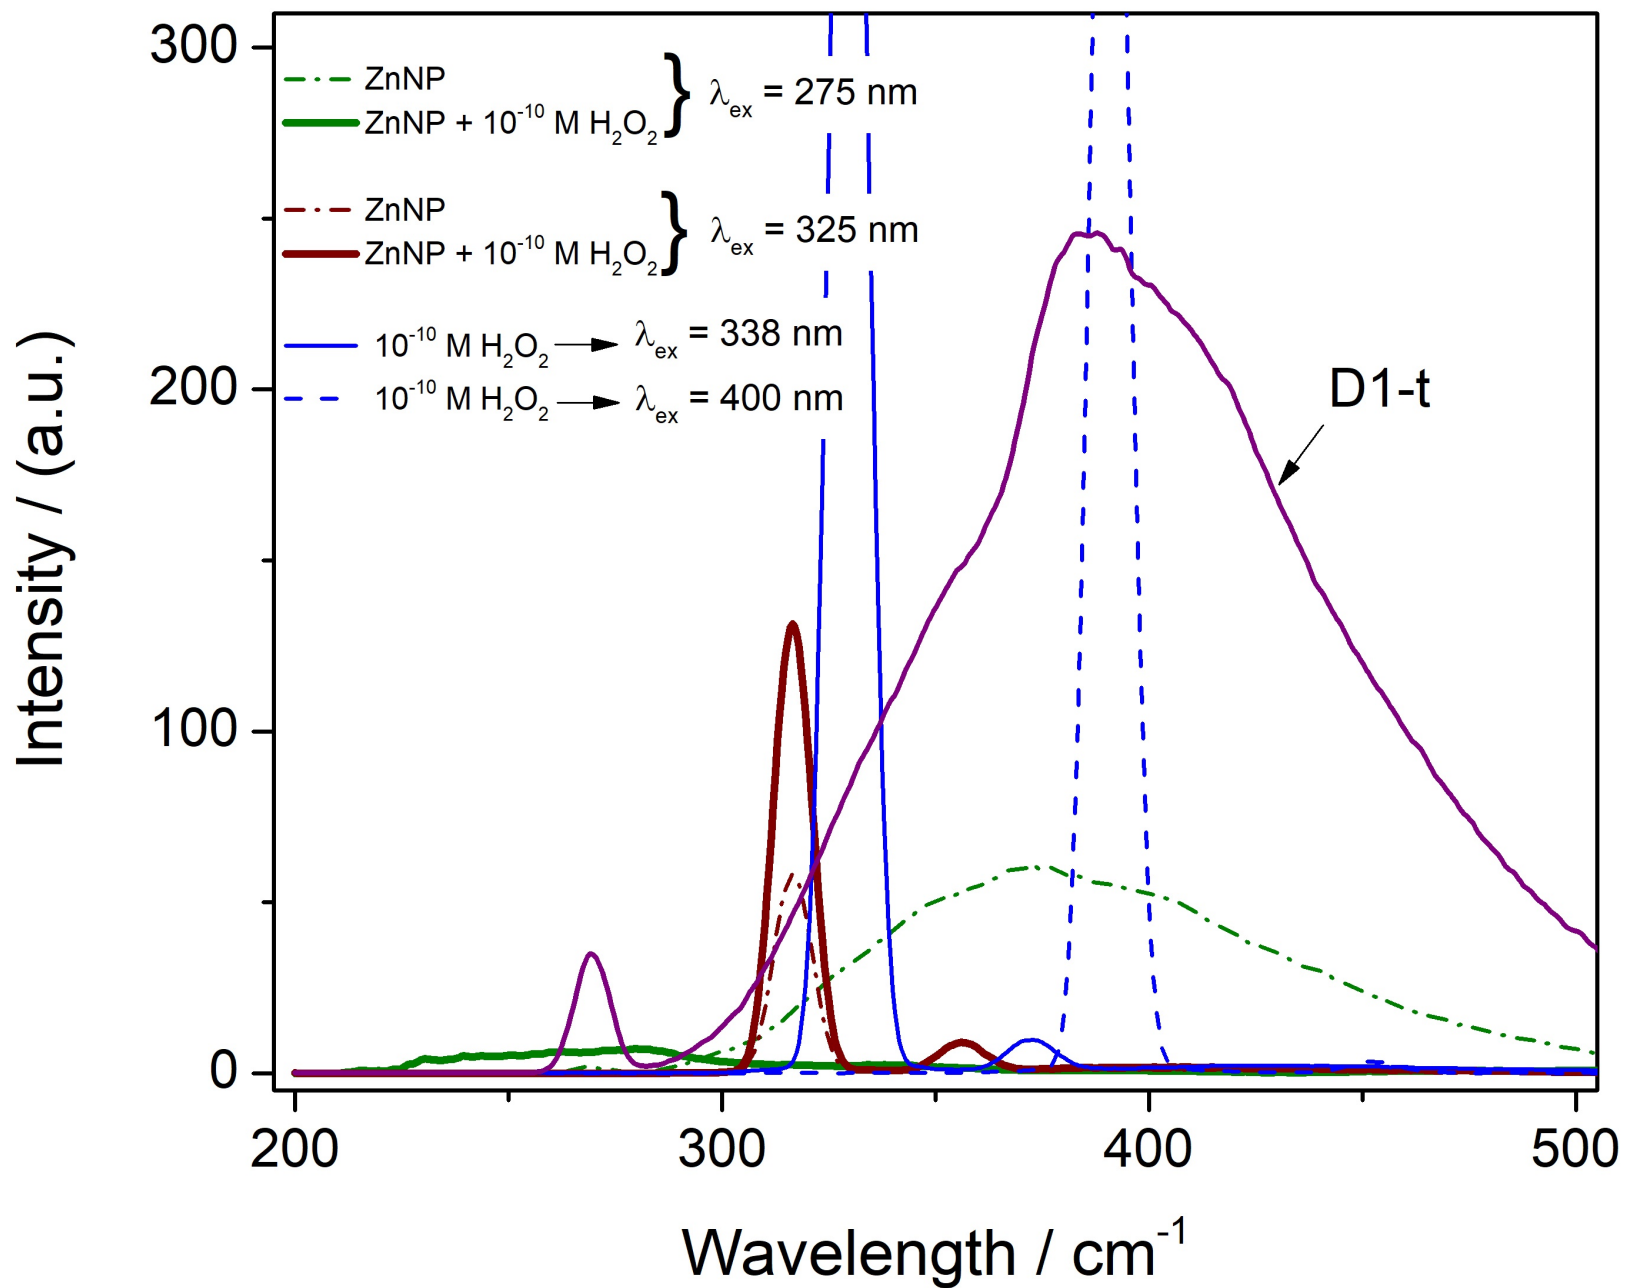

Supplement: d3ra02355a5.pdf [file d3ra02355a5.pdf]

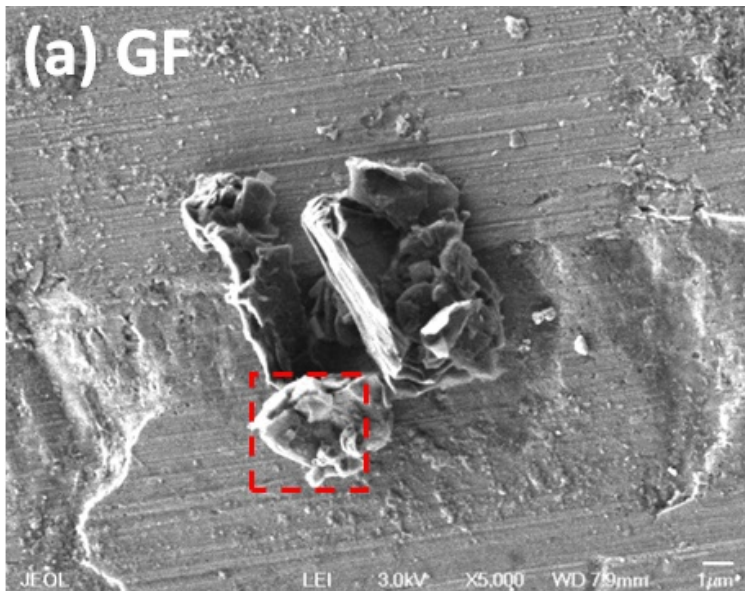

Supplement: d3ra02355a6.pdf [file d3ra02355a6.pdf]

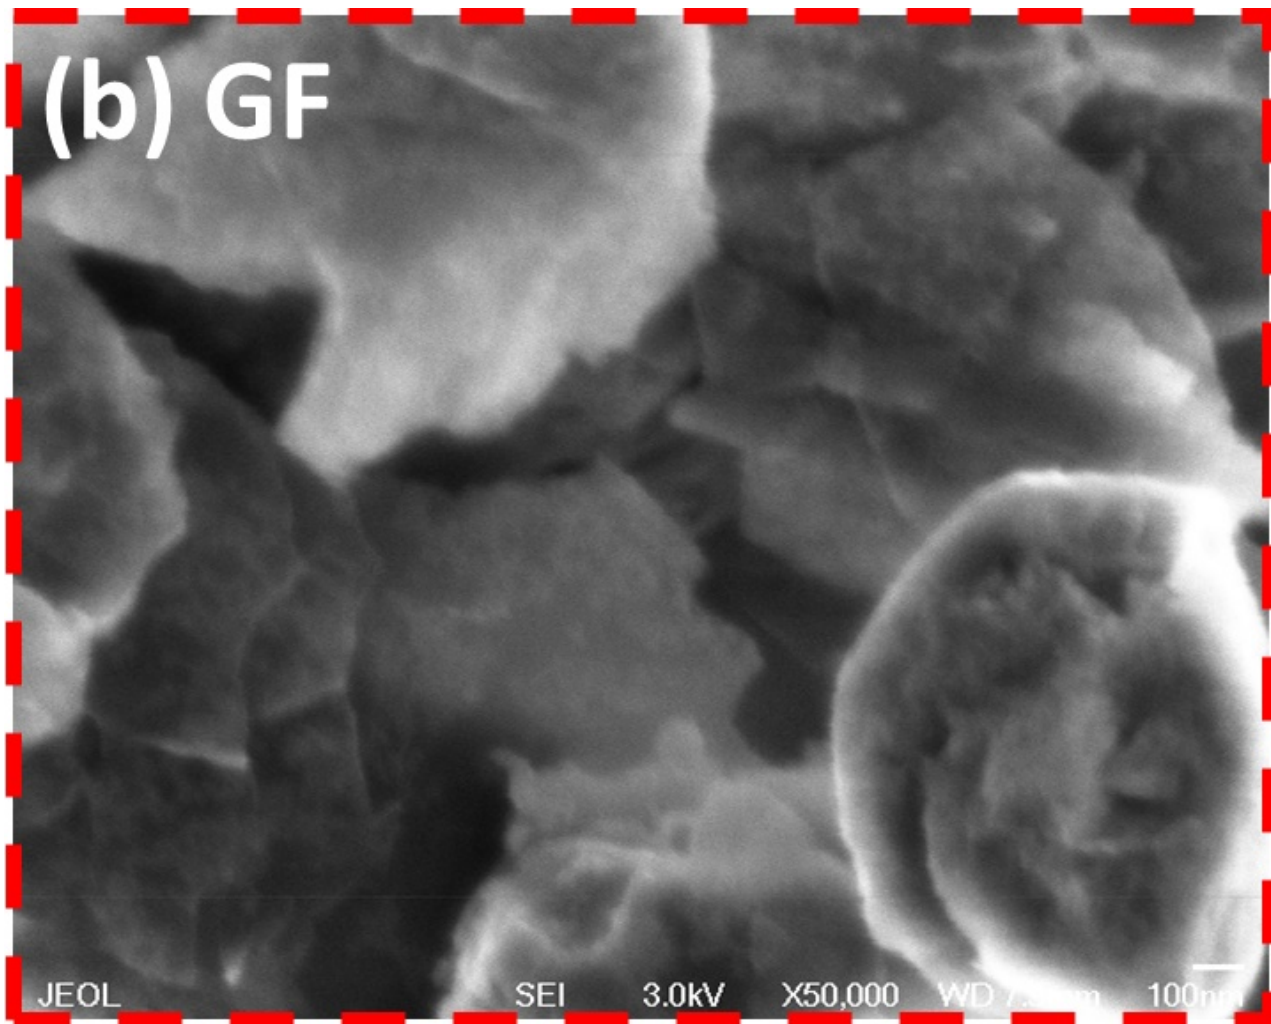

Supplement: d3ra02355a7.pdf [file d3ra02355a7.pdf]

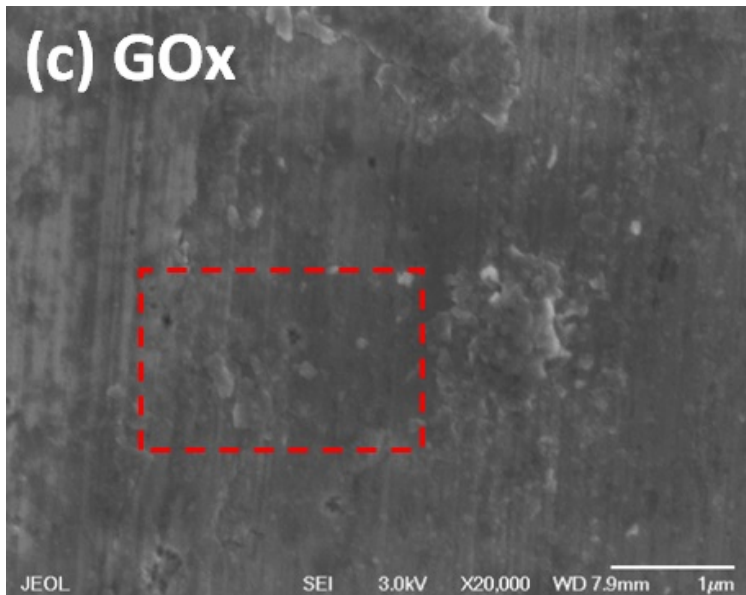

Supplement: d3ra02355a8.pdf [file d3ra02355a8.pdf]

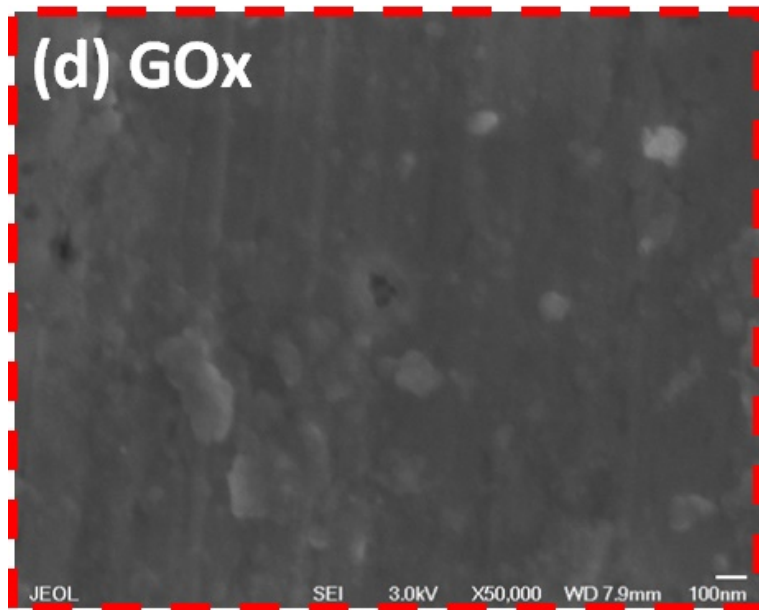

Supplement: d3ra02355a9.pdf [file d3ra02355a9.pdf]
